# Supplementary material for: COVID-19 vaccine effectiveness against severe disease from the Omicron BA.1 and BA.2 subvariants – surveillance results from southern Sweden, December 2021 to March 2022
Source: bioRxiv or medRxiv preprint supplement (doi:10.1101/2022.04.14.22273896), 2022-04-18
Supplement: Supplementary file [file media-1.pdf]

## **Supplementary Material**

COVID-19 vaccine effectiveness against severe disease from the Omicron BA.1 and BA.2 subvariants – surveillance results from southern Sweden, December 2021 to March 2022

Jonas Björk<sup>1,2</sup>, Carl Bonander<sup>3</sup>, Mahnaz Moghaddassi<sup>4</sup>, Magnus Rasmussen<sup>5</sup>, Ulf Malmqvist<sup>2</sup>, Malin Inghammar<sup>5</sup>, Fredrik Kahn<sup>5</sup>

<sup>1</sup>Clinical Studies Sweden, Forum South, Skåne University Hospital, Lund, Sweden

<sup>2</sup>Division of Occupational and Environmental Medicine, Lund University, Lund, Sweden

<sup>3</sup>School of Public Health and Community Medicine, Institute of Medicine, University of Gothenburg, Sweden

<sup>4</sup>Social Medicine and Global Health, Department of Clinical Sciences Malmö, Lund University, Malmö, Sweden

<sup>5</sup>Department of Clinical Sciences Lund, Section for Infection Medicine, Skåne University Hospital, Lund University, Lund, Sweden

### **Content**

Supplementary Table S1

Supplementary Table S2

Supplementary Table S3

**Supplementary Table S1.** Routine sequencing of samples of infected cases in Scania county, Sweden.

| Year         | 2021 | 2022 |     |     |     |     |     |     |     |     |     |     |
|--------------|------|------|-----|-----|-----|-----|-----|-----|-----|-----|-----|-----|
| Week         | 52   | 1    | 2   | 3   | 4   | 5   | 6   | 7   | 8   | 9   | 10  | 11  |
| Total        | 289  | 325  | 281 | 340 | 288 | 314 | 314 | 222 | 222 | 123 | 124 | 157 |
| Omicron BA.1 | 162  | 206  | 136 | 153 | 72  | 65  | 40  | 32  | 77  | 6   | 6   | 6   |
| Omicron BA.2 | 29   | 61   | 124 | 179 | 214 | 244 | 273 | 190 | 144 | 117 | 118 | 151 |
| Delta        | 98   | 58   | 21  | 8   | 2   | 5   | 1   | 0   | 1   | 0   | 0   | 0   |

**Supplementary Table S2.** Classification of comorbidities.

| <b>Disease group</b>                                                                                                                                                                                                                                                   | <b>ICD-10 codes (incl KVÅ-codes<sup>a</sup>)</b>                                                      |
|------------------------------------------------------------------------------------------------------------------------------------------------------------------------------------------------------------------------------------------------------------------------|-------------------------------------------------------------------------------------------------------|
| Cardiovascular diseases                                                                                                                                                                                                                                                | I10-I15, I20-I25, I42-I43<br>I50, I60-I69<br>J81                                                      |
| Diabetes or obesity                                                                                                                                                                                                                                                    | E10, E11, E66                                                                                         |
| Kidney or liver diseases                                                                                                                                                                                                                                               | K70.X, K74.3-K74.6, K75.4,<br>K76.0<br>N18.5, N18.9<br>DR016, DR024                                   |
| Respiratory diseases                                                                                                                                                                                                                                                   | A15-A19<br>E84<br>I26, I27<br>J42, J43, J44, J45, J47, J84<br>J96, J98.2, J98.3                       |
| Neurological diseases (including dementia)                                                                                                                                                                                                                             | G00-G99<br>F00-F03                                                                                    |
| Cancer or immunosuppressed state (including organ transplantation)                                                                                                                                                                                                     | C00-C99<br>KAS, FQA, FQB, JJC, GDG, JLE<br>DR046, DR047, DR048<br>D80.0-D80.1<br>D80.5, D81, D82, D83 |
| Other conditions and diseases <ul style="list-style-type: none"> <li>• HIV</li> <li>• Thalassemia</li> <li>• Sickle cell</li> <li>• Mood disorders</li> <li>• Schizophrenia spectrum disorders</li> <li>• Substance use disorders</li> <li>• Downs syndrome</li> </ul> | B20-B24<br>D56, D57<br>F10-F19, F30-F39, F20-F29<br>Q90                                               |

<sup>a</sup> Swedish classification of certain interventions during health care visits

**Supplementary Table S3.** Vaccine effectiveness after at least three or two doses against severe COVID-19 in each follow up period. Estimates were obtained from conditional logistic regression for age and sex matched case and controls (1:10), and with adjustment for comorbidities (0, 1,  $\geq 2$ ) and infection at least 90 days prior the case date. Results are presented overall and stratified by age, sex and comorbidities.

|                             | Follow up period                 |                          |                            |
|-----------------------------|----------------------------------|--------------------------|----------------------------|
|                             | Omicron BA.1<br>2021 w52-2022 w1 | Transition<br>2022 w2-3  | Omicron BA.2<br>2022 w4-11 |
|                             | VE (95% CI) <sup>a</sup>         | VE (95% CI) <sup>a</sup> | VE (95% CI) <sup>a</sup>   |
| <i>At least three doses</i> |                                  |                          |                            |
| All                         | 94 (84 – 98)                     | 90 (82 – 95)             | 82 (64 – 91)               |
| Age                         |                                  |                          |                            |
| < 65 years                  | 92 (73 – 98)                     | 74 (16 – 92)             | 76 (32 – 91)               |
| $\geq 65$ years             | 94 (76 – 98)                     | 92 (83 – 97)             | 82 (56 – 93)               |
| Sex                         |                                  |                          |                            |
| Females                     | 92 (74 – 97)                     | 93 (81 – 98)             | 78 (35 – 93)               |
| Males                       | 96 (79 – 100)                    | 89 (74 – 96)             | 84 (62 – 93)               |
| Comorbidities               |                                  |                          |                            |
| None                        | 99 (53 – 100)                    | 96 (81 – 100)            | 77 (27 – 92)               |
| $\geq 1$                    | 90 (44 – 98)                     | 84 (54 – 95)             | 85 (48 – 96)               |
| <i>Two doses</i>            |                                  |                          |                            |
| All                         | 90 (78 – 95)                     | 70 (42 – 84)             | 54 (13 – 75)               |
| Age                         |                                  |                          |                            |
| < 65 years                  | 93 (81 – 98)                     | 78 (35 – 93)             | 59 (4 – 83)                |
| $\geq 65$ years             | 84 (37 – 96)                     | 55 (0 – 81)              | 43 (0 – 79)                |
| Sex                         |                                  |                          |                            |
| Females                     | 88 (65 – 96)                     | 73 (37 – 88)             | 53 (0 – 82)                |
| Males                       | 92 (73 – 98)                     | 67 (14 – 87)             | 54 (0 – 80)                |
| Comorbidities               |                                  |                          |                            |
| None                        | 96 (66 – 100)                    | 79 (32 – 94)             | 61 (2 – 85)                |
| $\geq 1$                    | 77 (0 – 95)                      | 58 (0 – 86)              | 46 (0 – 86)                |

<sup>a</sup>Vaccine effectiveness (95% confidence interval)
